# Supplementary material for: Baobab-Fruit Shell and Fibrous Filaments Are Sources of Antioxidant Dietary Fibers
Source: MDPI journal article supplement (doi:10.3390/molecules27175563), 2022-08-29

## **SUPPLEMENTARY MATERIALS**

# **Baobab-Fruit Shell and Fibrous Filaments Are Sources of Antioxidant Dietary Fibers**

**Manuela Flavia Chiacchio <sup>1</sup>, Silvia Tagliamonte<sup>1</sup>, Attilio Visconti<sup>1</sup>, Rosalia Ferracane<sup>1</sup>, Arwa Mustafa <sup>2</sup> and Paola Vitaglione <sup>1,\*</sup>**

<sup>1</sup> Department of Agricultural Sciences, University of Naples "Federico II", 80055 Portici, Italy

<sup>2</sup> ARWA Foodtech AB, 22363 Lund, Sweden

\* Correspondence: [paola.vitaglione@unina.it](mailto:paola.vitaglione@unina.it)

**Figure S1:** Extracted Ion Chromatograms (XIC) of baobab pulp (A), shell (B), fibrous filaments (C) and seeds (D) confirmed by HPLC-MS/MS

A

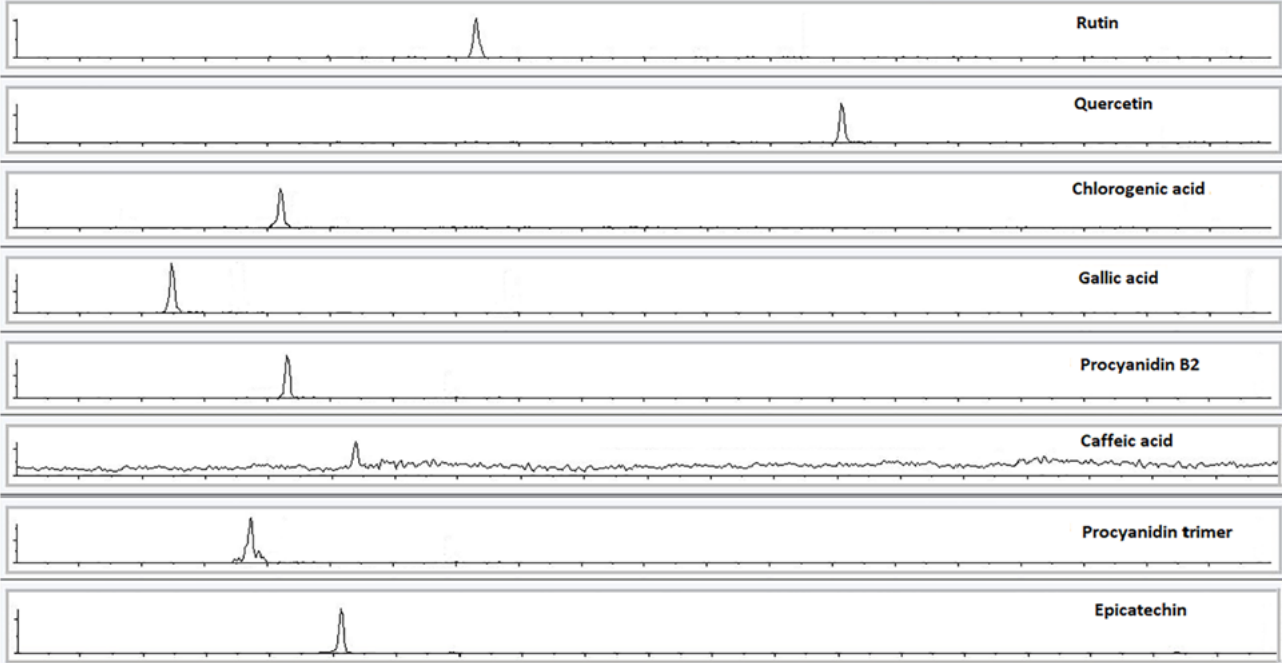

B

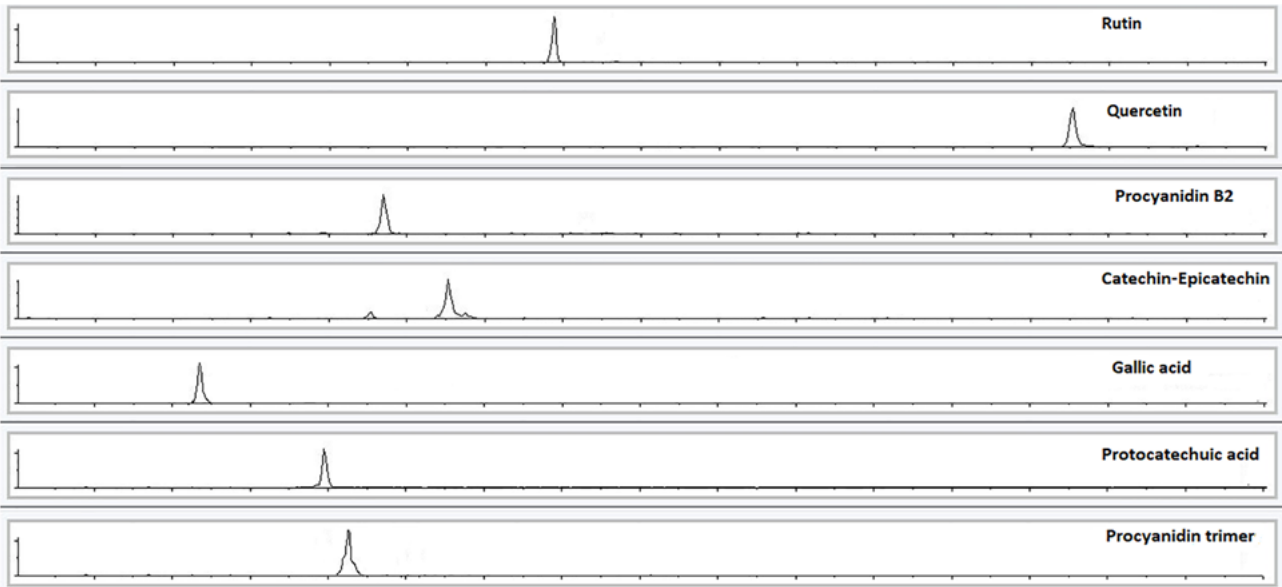

C

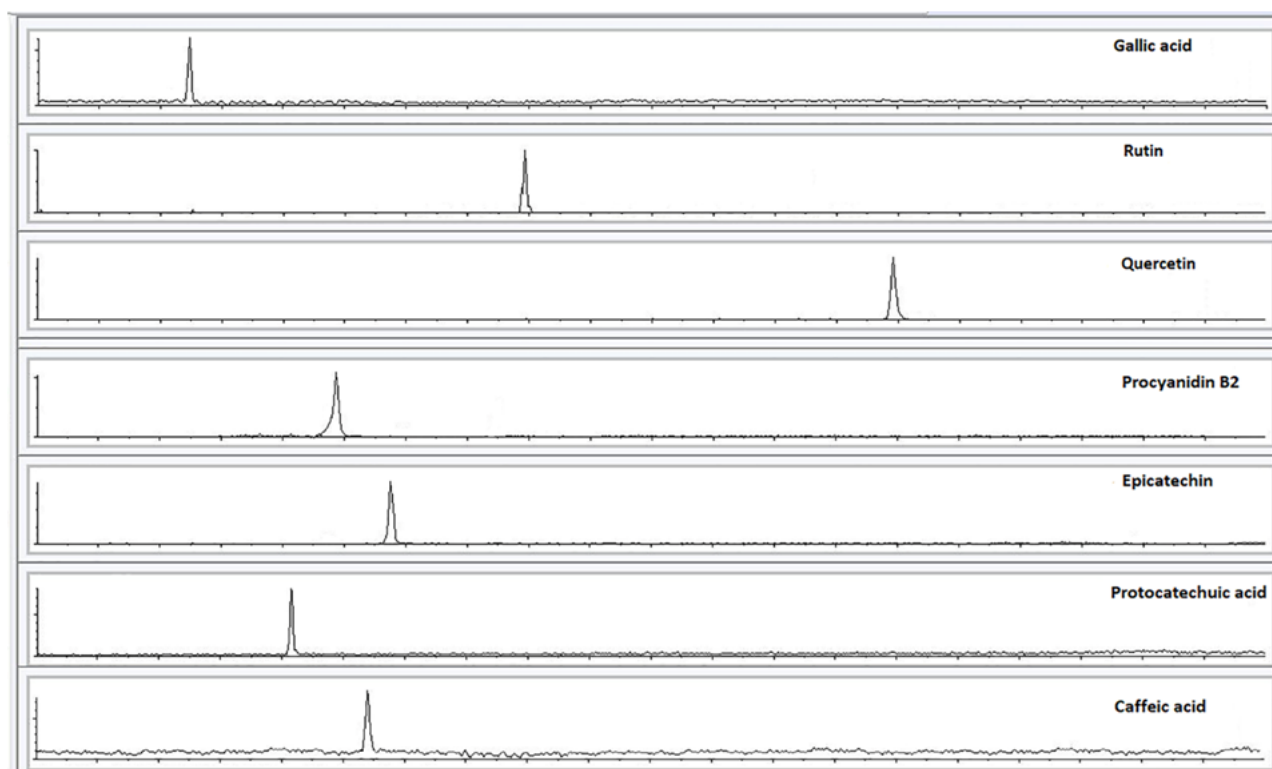

D

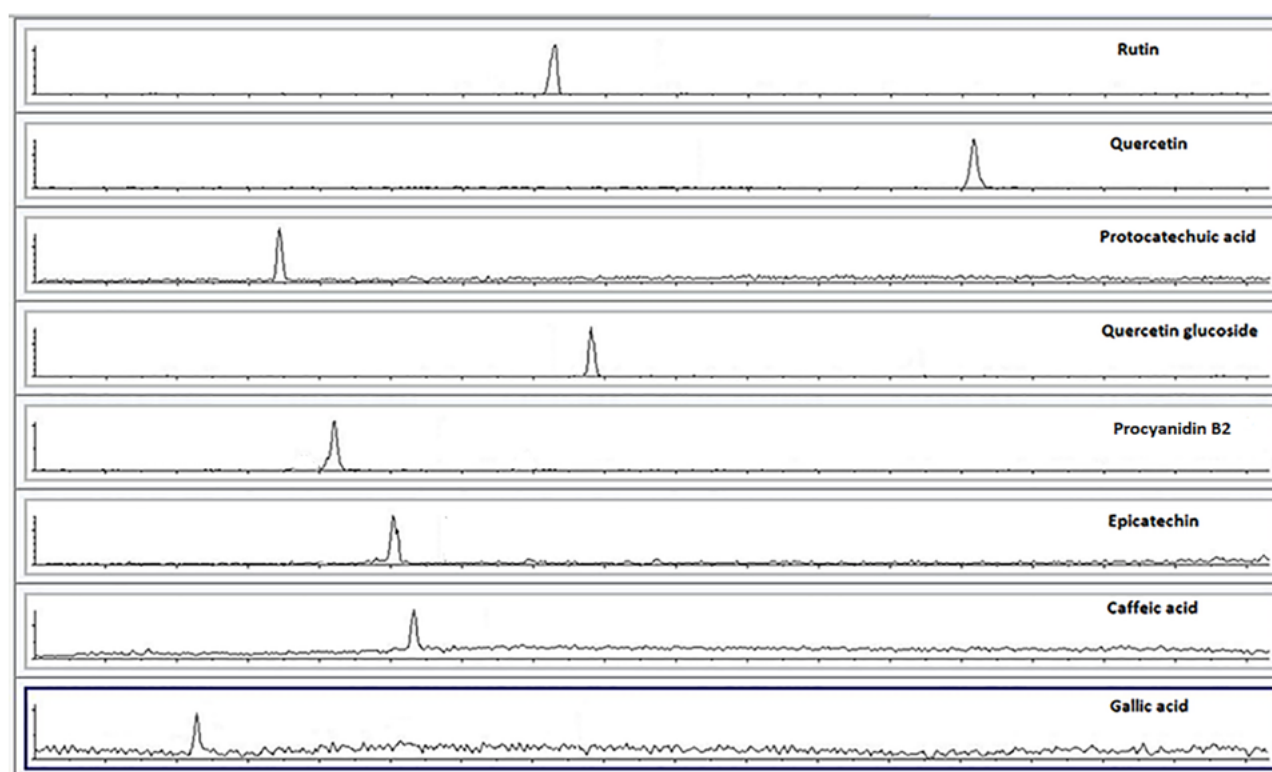

Supplement: s1 [file s1]
